# Supplementary material for: Enabling discrimination capability in an achiral F6BT-based organic semiconductor transistor via circularly polarized light induction
Source: Royal Society of Chemistry journal article supplement (doi:10.1039/d0tc01704c), 2020-01-01
Supplement: d0tc01704c1.pdf [file d0tc01704c1.pdf]

## Supporting Information

# Enable Discrimination Capability to Achiral F6BT based Organic Semiconductor Transistor via Circularly Polarized Light Induction

Junjie Cheng,<sup>‡a</sup> Feng Ge,<sup>‡b</sup> Can Zhang,<sup>b</sup> Yan Kuai,<sup>c</sup> Penghui Hou,<sup>a</sup> Yifeng Xiang,<sup>c</sup> Douguo Zhang,<sup>c</sup> Longzhen Qiu,<sup>\*b</sup>, Qijin Zhang<sup>a</sup> and Gang Zou<sup>\*a</sup>

<sup>a</sup>CAS Key Laboratory of Soft Matter Chemistry, Department of Polymer Science and Engineering, iChEM, University of Science and Technology of China, Hefei, Anhui 230026, P. R. China. E-mail: gangzou@ustc.edu.cn

<sup>b</sup>Key Lab of Special Display Technology, Ministry of Education, National Engineering Lab of Special Display Technology, State Key Lab of Advanced Display Technology, Academy of Opto-Electronic Technology, Hefei University of Technology, Hefei, Anhui 230009, P. R. China. E-mail: lzhqiu@hfut.edu.cn

<sup>c</sup>Advanced Laser Technology Laboratory of Anhui Province and Institute of Photonics, Department of Optics and Optical Engineering, University of Science and Technology of China, Hefei, Anhui 230026, P. R. China

<sup>‡</sup>These authors contributed equally to this work.

Estimation of Electrical Properties:

The field-effect mobility ( $\mu$ ) and threshold voltage ( $V_T$ ) were extracted from the saturation regime transfer characteristics ( $V_D = -60$  V) with following equation:

$$I_D = \frac{W}{2L} \mu C_i (V_G - V_T)^2$$

where  $V_D$ ,  $V_G$  and  $I_D$  are the drain voltage, gate voltage and drain current, respectively. While  $W$ ,  $L$ ,  $\mu$  are the channel width, channel length and insulator capacitance per unit area of the gate dielectric, respectively.

The photocurrent/dark-current ratio ( $P$ ), photoresponsivity ( $R$ ) and detectivity ( $D^*$ ) could be typically defined by the following equations:

$$P = \frac{I_{ph}}{I_{dark}} = \frac{I_{light} - I_{dark}}{I_{dark}}$$

$$R = \frac{I_{ph}}{SP_{inc}} = \frac{I_{light} - I_{dark}}{SP_{inc}}$$

$$D^* = \frac{\sqrt{SR}}{\sqrt{2qI_{dark}}}$$

where  $I_{ph}$ ,  $I_{light}$  and  $I_{dark}$  are the generated photocurrent, the drain current under illumination and the drain current in the dark, respectively.  $P_{inc}$ ,  $S$  and  $q$  are the incident illumination power upon the channel, the area of the channel exposed to illumination, and the electron charge, respectively.

The external quantum efficiency (EQE,  $\eta$ ), which could be defined as the ratio of the number of photogenerated carriers to the number of photons incident onto the OFET channel area, was measured using the following equation:

$$\eta = \frac{Rhc}{q\lambda}$$

where  $h$ ,  $c$  and  $\lambda$  are the Planck constant, the speed of light and the incident light wavelength, respectively.

In addition, the anisotropy factor of responsivity ( $g_{res}$ ) was defined by the following equation:

$$g_{res} = \frac{2(R_L - R_R)}{R_L + R_R}$$

where  $R_L$  and  $R_R$  are the responsivity under LCP and RCP illumination, respectively.



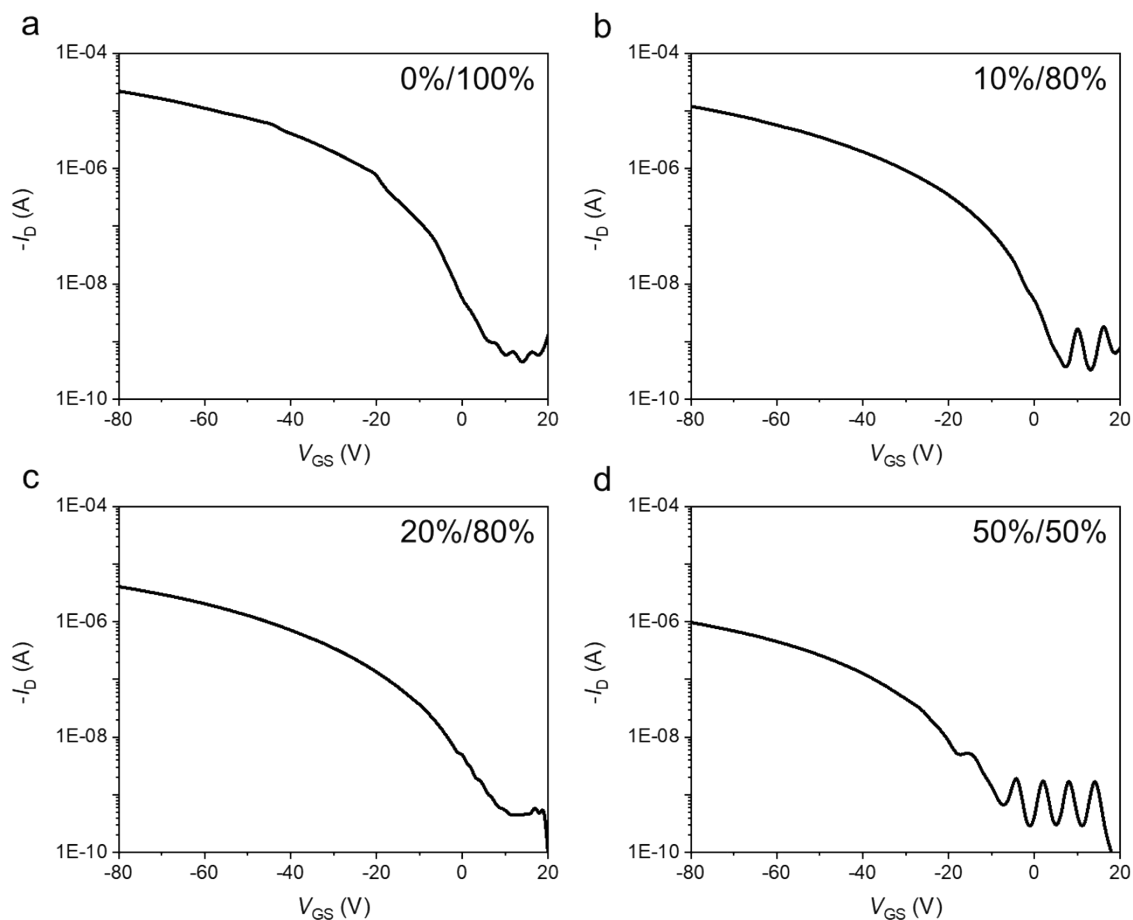

**Fig. S1** Transfer characteristics of the F6BT/P3HT OFETs with various F6BT contents. (a) 0%/100%. (b) 10%/90%. (c) 20%/80%. (d) 50%/50%. w/w.

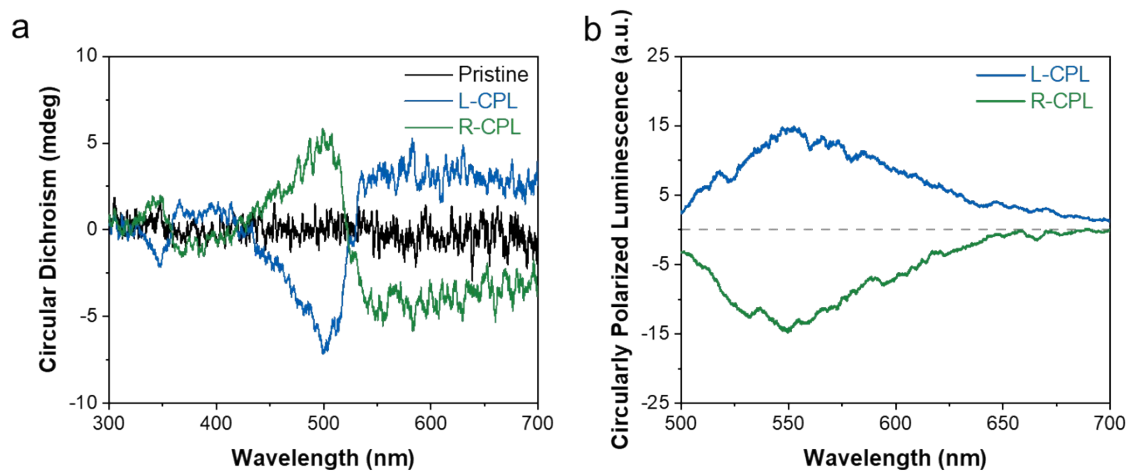

**Fig. S2** (a) Circular dichroism and (b) circularly polarized luminescence spectra of pristine samples (Pristine, black), pristine samples irradiated with circularly polarized light in the handedness of left (L-CPL, blue) and right (R-CPL, green), respectively.

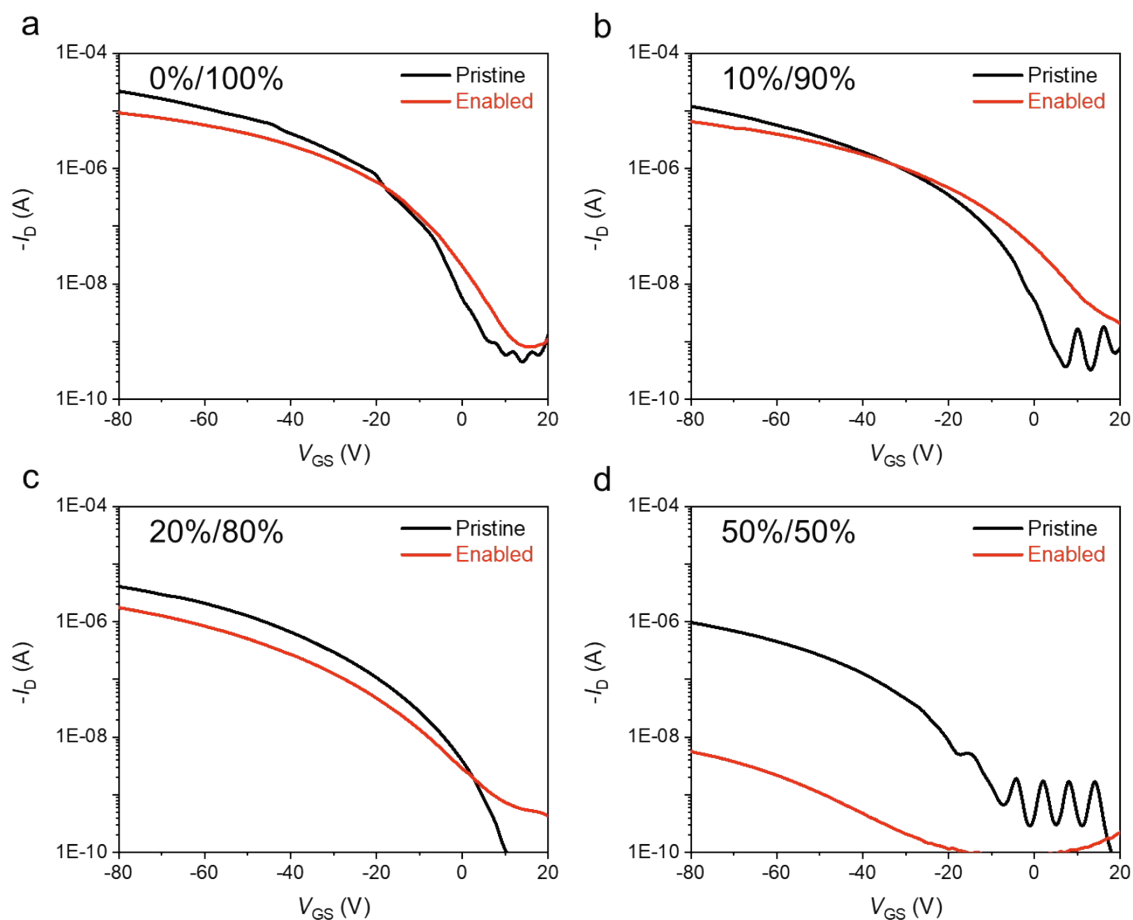

**Fig. S3** The performance degradation of the enabled F6BT/P3HT OFETs with various F6BT contents. (a) 0%/100%. (b) 10%/90%. (c) 20%/80%. (d) 50%/50%. w/w.

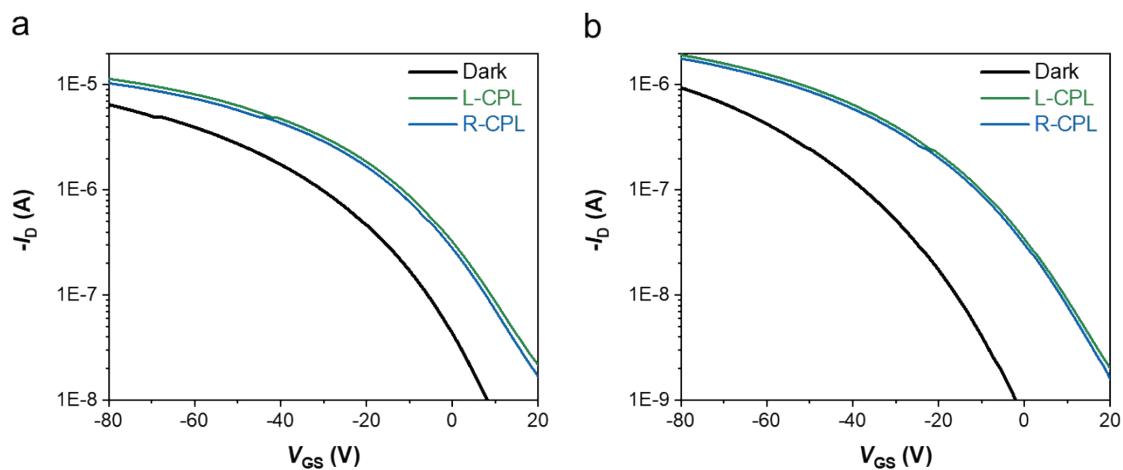

**Fig. S4** Photo-responses of the enabled F6BT/P3HT OFETs to left-/right-handed CPL. (a) 10%/90%. (b) 20%/80%. Enabled by L-CPL for 20 min.

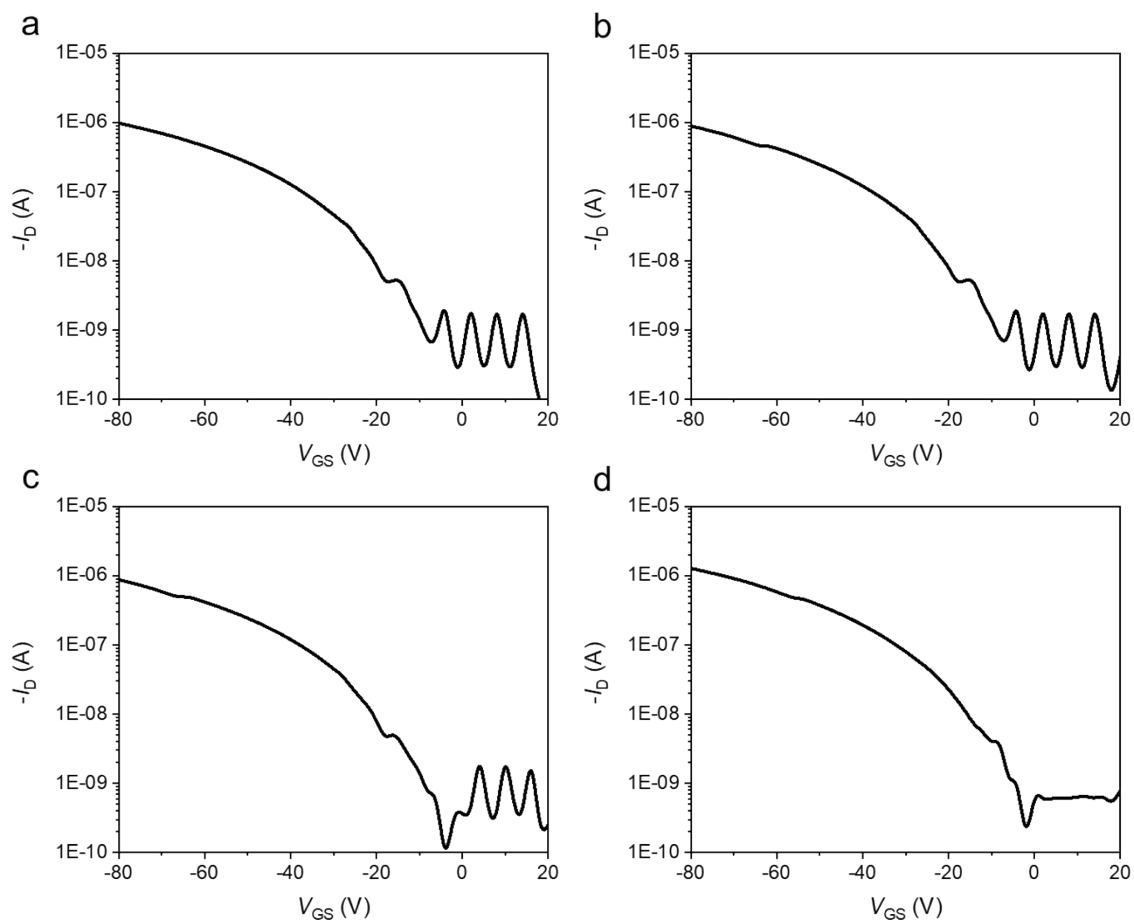

**Fig. S5** Transfer characteristics from the same batch of the pristine F6BT/P3HT (50/50, w%/w%.) OFETs.

**Table S1** Summary of the pristine F6BT/P3HT OFETs electrical properties

| F6BT/P3HT<br>w/w (%/%) | field-effect mobility<br>$\mu$ (cm <sup>2</sup> V <sup>-1</sup> s <sup>-1</sup> ) | threshold voltage<br>$V_T$ (V) | on/off current ratio |
|------------------------|-----------------------------------------------------------------------------------|--------------------------------|----------------------|
| 0/100                  | $8.39 \times 10^{-2}$                                                             | -10.6                          | $6.88 \times 10^4$   |
| 90/10                  | $4.46 \times 10^{-2}$                                                             | -11.8                          | $3.70 \times 10^4$   |
| 80/20                  | $1.63 \times 10^{-2}$                                                             | -12.0                          | $9.14 \times 10^3$   |
| 50/50                  | $4.73 \times 10^{-3}$                                                             | -18.0                          | $3.47 \times 10^3$   |

**Table S2** Summary of the enabled F6BT/P3HT OFETs electrical properties

| devices          | condition | field-effect mobility<br>$\mu$ (cm <sup>2</sup> V <sup>-1</sup> s <sup>-1</sup> ) | threshold voltage<br>$V_T$ (V) | on/off current ratio |
|------------------|-----------|-----------------------------------------------------------------------------------|--------------------------------|----------------------|
| L-CPL<br>enabled | Dark      | $3.83 \times 10^{-5}$                                                             | -27.6                          | 65.0                 |
|                  | L-CPL     | $1.76 \times 10^{-5}$                                                             | 49.4                           | 8.2                  |
|                  | R-CPL     | $8.92 \times 10^{-6}$                                                             | 55.4                           | 5.3                  |
| R-CPL<br>enabled | Dark      | $8.95 \times 10^{-6}$                                                             | -17.2                          | 44.4                 |
|                  | L-CPL     | $2.10 \times 10^{-6}$                                                             | 54.5                           | 5.3                  |
|                  | R-CPL     | $3.53 \times 10^{-6}$                                                             | 47.0                           | 7.7                  |

**Table S3** Summary of the enabled F6BT/P3HT OFETs photosensitivity properties

| Devices          | Condition | $P$   | $R$<br>A W <sup>-1</sup> | $D^*$<br>Jones     | EQE<br>%              |
|------------------|-----------|-------|--------------------------|--------------------|-----------------------|
| L-CPL<br>enabled | L-CPL     | 40.34 | $1.86 \times 10^{-5}$    | $7.44 \times 10^7$ | $1.62 \times 10^{-3}$ |
|                  | R-CPL     | 23.38 | $9.42 \times 10^{-6}$    | $4.21 \times 10^7$ | $8.16 \times 10^{-4}$ |
| R-CPL<br>enabled | L-CPL     | 12.48 | $3.46 \times 10^{-6}$    | $1.80 \times 10^7$ | $1.87 \times 10^{-4}$ |
|                  | R-CPL     | 9.08  | $2.15 \times 10^{-6}$    | $1.27 \times 10^7$ | $3.02 \times 10^{-4}$ |
